# Supplementary material for: Systematic review of cost effectiveness and budget impact of artificial intelligence in healthcare
Source: Springer Nature journal article supplement (doi:10.1038/s41746-025-01722-y), 2025-08-26
Supplement: MOESM1 [file 41746_2025_1722_MOESM1_ESM.pdf]

**Supplementary Table 1. Summary of Studies Categorized by Modeling Approach**

| Study (Author, Year)      | Intervention/Focus Area                                             | Model Type / Economic Evaluation Methodology                                                                                              | Static vs. Dynamic |
|---------------------------|---------------------------------------------------------------------|-------------------------------------------------------------------------------------------------------------------------------------------|--------------------|
| Murtojärvi et al. (2020)  | Metastatic castration-resistant prostate cancer                     | Prognostic models using Greedy and LASSO feature selection                                                                                | Static             |
| Hill et al. (2020)        | Atrial fibrillation screening using an ML risk prediction algorithm | ML risk prediction algorithm using clinical and demographic data                                                                          | Dynamic            |
| Mori et al. (2020)        | AI-aided polyp diagnosis in colonoscopy                             | Cost-minimization analysis based on clinical trial data                                                                                   | Static             |
| Hendrix et al. (2022)     | Economic evaluation framework for clinical AI intervention          | Theoretical analysis and conceptual framework development that outlines multiple evaluation methods (CEA, CUA, CBA, CMA) as applied to AI | Static             |
| Karabeg et al. (2024)     | AI (EyeArt®) vs. ophthalmologist for DR screening in minority women | Cost-minimization analysis for a single screening episode                                                                                 | Static             |
| Huang et al. (2022)       | AI screening for diabetic retinopathy in rural China                | Hybrid decision tree and Markov model                                                                                                     | Dynamic            |
| Schwendicke et al. (2021) | AI for proximal caries detection                                    | Markov model with Monte Carlo microsimulations                                                                                            | Dynamic            |
| Areia et al. (2022)       | AI-assisted colonoscopy screening for colorectal cancer             | Markov model microsimulation study                                                                                                        | Dynamic            |
| de Vos et al. (2022)      | AI tool to prevent untimely ICU discharge                           | Cost-utility analysis using a 7-state Markov model                                                                                        | Dynamic            |
| Ericson et al. (2022)     | Early detection of sepsis in ICUs                                   | Decision tree-based health economic modeling                                                                                              | Static             |
| Kessler et al. (2021)     | AI-assisted medication management in a Medicaid population          | Retrospective observational analysis using regression methods                                                                             | Static             |
| Mital & Nguyen (2022)     | AI vs. polygenic risk score for breast cancer screening             | Hybrid decision tree/microsimulation model                                                                                                | Dynamic            |
| Nsengiyumva et al. (2021) | AI-based chest X-ray triage for TB symptoms                         | Decision analysis model (decision tree)                                                                                                   | Static             |
| Salcedo et al. (2021)     | AI monitoring for active tuberculosis treatment adherence           | Markov model-based cost-effectiveness analysis                                                                                            | Dynamic            |

| Study (Author, Year)      | Intervention/Focus Area                                                    | Model Type / Economic Evaluation Methodology                                           | Static vs. Dynamic |
|---------------------------|----------------------------------------------------------------------------|----------------------------------------------------------------------------------------|--------------------|
| van Leeuwen et al. (2021) | AI-aided vessel occlusion detection in acute stroke                        | Markov model-based cost-effectiveness analysis                                         | Dynamic            |
| Xiao et al. (2021)        | AI-assisted glaucoma screening in rural China                              | Markov model-based health economic analysis                                            | Dynamic            |
| Ziegelmayr et al. (2022)  | AI-assisted lung cancer screening with LDCT                                | Markov model-based cost-effectiveness analysis with probabilistic sensitivity analysis | Dynamic            |
| Gomez Rossi et al. (2022) | AI as decision-support for melanoma, dental caries, & diabetic retinopathy | Markov model-based cost-effectiveness analysis (lifetime modeling)                     | Dynamic            |
| Szymanski et al. (2022)   | ML algorithm for AF risk prediction (budget impact analysis)               | National population model over a 3-year projection                                     | Dynamic            |

#### Abbreviation Legend:

- **AI** – Artificial Intelligence
- **ML** – Machine Learning
- **DR** – Diabetic Retinopathy
- **ICU** – Intensive Care Unit
- **LDCT** – Low-Dose Computed Tomography
- **TB** – Tuberculosis
- **CEA** – Cost-Effectiveness Analysis
- **CUA** – Cost-Utility Analysis
- **CBA** – Cost-Benefit Analysis
- **CMA** – Cost-Minimization Analysis
- **Static Models** – Economic evaluation models with fixed parameters (i.e., no adaptive learning or time-dependent changes)
- **Dynamic Models** – Economic evaluation models incorporating adaptive features, such as learning curves or time-dependent transition probabilities

Supplementary Table 2: CHEERS 2022 Checklist for the 19 Included Studies

| Study                    | CHEERS Items Adequately Reported (out of 28) | Key Reporting Strengths                                                                      | Key Reporting Limitations                                              |
|--------------------------|----------------------------------------------|----------------------------------------------------------------------------------------------|------------------------------------------------------------------------|
| Areia et al., 2022       | 25/28                                        | Clear objectives; comprehensive methods; detailed sensitivity analyses and outcome reporting | Minor details on currency conversion and cost year not fully described |
| de Vos et al., 2022      | 24/28                                        | Well-defined perspective; detailed cost components; clear comparator description             | Limited reporting on indirect costs in some sections                   |
| Ericson et al., 2022     | 23/28                                        | Robust description of effectiveness data; clear time horizon; adequate sensitivity analyses  | Limited details on utility measurement and valuation                   |
| Gomez Rossi et al., 2022 | 27/28                                        | Detailed reporting across specialties; clear incremental analysis and outcomes               | Slight variability in reporting subgroup heterogeneity                 |
| Hendrix et al., 2022     | 24/28                                        | Comprehensive framework; clear assumptions; transparent multi-perspective reporting          | Conceptual approach with less granular numerical detail                |
| Hill et al., 2020        | 25/28                                        | Clear comparator descriptions; robust sensitivity analyses; detailed screening strategy      | Minor omissions in discounting method details                          |
| Huang et al., 2022       | 23/28                                        | Thorough description of methods and outcomes; clear perspective and time horizon             | Some uncertainty regarding currency conversion details and cost year   |
| Karabeg et al., 2024     | 21/28                                        | Clear description of setting and population; direct comparison of AI vs. human grading       | Small sample size limits detailed heterogeneity reporting              |
| Kessler et al., 2021     | 24/28                                        | Detailed cost estimation; clear perspective; comprehensive methods                           | Limited discussion regarding underlying model assumptions              |

|                          |       |                                                                                                    |                                                                                   |
|--------------------------|-------|----------------------------------------------------------------------------------------------------|-----------------------------------------------------------------------------------|
| Mital & Nguyen, 2022     | 25/28 | Comprehensive reporting of screening strategy and incremental results; clear comparator definition | Some variability in reporting valuation of preference-based outcomes              |
| Mori et al., 2020        | 24/28 | Detailed methodology; clear cost components; well-reported sensitivity analyses                    | Certain aspects of the sensitivity analyses could be more elaborated              |
| Murtojärvi et al., 2020  | 24/28 | Clear definition of target population; explicit reporting of feature selection methods             | Some missing details on indirect costs and model assumptions                      |
| Nsengiyumva et al., 2021 | 23/28 | Clear reporting of comparators and cost estimation; adequate analytic approach                     | Limited subgroup analyses; fewer details on indirect cost components              |
| Salcedo et al., 2021     | 23/28 | Adequate description of effectiveness and cost components; clear incremental analysis              | Short time horizon limits reporting of long-term outcomes                         |
| Schwendicke et al., 2021 | 25/28 | Comprehensive outcome measurement; detailed discounting; robust sensitivity analyses               | Minor omissions regarding indirect cost reporting                                 |
| Szymanski et al., 2022   | 24/28 | Good reporting of model inputs; extensive sensitivity analyses; clear alternatives                 | Some aspects of heterogeneity not deeply discussed                                |
| van Leeuwen et al., 2021 | 24/28 | Detailed reporting of cost, effectiveness, and discounting parameters; clear incremental analysis  | Limited validation of long-term projections; some assumptions need further detail |
| Xiao et al., 2021        | 23/28 | Clear description of screening strategy and outcomes; adequate cost reporting                      | Some uncertainty in reporting capital cost details and conversion methods         |
| Ziegelmayr et al., 2022  | 25/28 | Extensive sensitivity and threshold analyses; clear reporting of cost and                          | Some variability in reporting specific model assumptions,                         |

|  |  |                                           |                                           |
|--|--|-------------------------------------------|-------------------------------------------|
|  |  | outcome measures<br>with robust modelling | requiring further<br>empirical validation |
|--|--|-------------------------------------------|-------------------------------------------|

Supplementary Table 3: Drummond Checklist for the 19 Included Studies

| Study                    | Drummond Items Fully Met (out of 10) | Key Methodological Strengths                                                                                           | Key Methodological Limitations                                                               |
|--------------------------|--------------------------------------|------------------------------------------------------------------------------------------------------------------------|----------------------------------------------------------------------------------------------|
| Areia et al., 2022       | 9/10                                 | Clearly defined alternatives; robust incremental analysis; thorough sensitivity testing                                | Some uncertainty in cost valuation methods                                                   |
| de Vos et al., 2022      | 8/10                                 | Well-described comparators; established effectiveness data                                                             | Certain cost assumptions not fully justified                                                 |
| Ericson et al., 2022     | 9/10                                 | Detailed incremental analysis; robust sensitivity analyses; appropriate outcome measurement                            | Limited valuation of indirect costs                                                          |
| Gomez Rossi et al., 2022 | 9/10                                 | Clear identification of costs and outcomes; detailed incremental analyses across specialties                           | Variability in outcome measurement for diabetic retinopathy                                  |
| Hendrix et al., 2022     | 8/10                                 | Comprehensive identification of alternatives; clear listing of assumptions                                             | Conceptual framework lacks granular quantitative valuation                                   |
| Hill et al., 2020        | 9/10                                 | Effective measurement and incremental analysis; strong sensitivity testing                                             | Minor limitations in valuation of certain cost components                                    |
| Huang et al., 2022       | 8/10                                 | Well-established effectiveness data; robust modelling                                                                  | Some details of cost and outcome valuation are less clearly described                        |
| Karabeg et al., 2024     | 8/10                                 | Clear description of alternatives; effective incremental analysis                                                      | Limited sample size reduces robustness and generalizability                                  |
| Kessler et al., 2021     | 9/10                                 | Comprehensive cost and outcome measurement; robust regression analysis                                                 | Retrospective design may introduce bias                                                      |
| Mital & Nguyen, 2022     | 9/10                                 | Detailed incremental analysis; robust sensitivity testing; clear comparator definition                                 | Model assumptions are specific to a single population                                        |
| Mori et al., 2020        | 8/10                                 | Innovative prognostic modelling with effective incremental analysis                                                    | Some measurement details (e.g., missing variables) are less elaborated                       |
| Murtojärvi et al., 2020  | 8/10                                 | Clear definition of target population; explicit reporting of feature selection methods; effective incremental analysis | Some missing details on indirect cost components and full justification of model assumptions |
| Nsengiyumva et al., 2021 | 8/10                                 | Clear establishment of effectiveness and cost measures; robust sensitivity analysis                                    | Short time horizon and omission of some indirect cost components                             |

|                          |      |                                                                                               |                                                                            |
|--------------------------|------|-----------------------------------------------------------------------------------------------|----------------------------------------------------------------------------|
| Salcedo et al., 2021     | 8/10 | Clear incremental analysis and outcome measurement; comprehensive sensitivity testing         | Limited follow-up reduces assessment of long-term benefits                 |
| Schwendicke et al., 2021 | 9/10 | Thorough identification and measurement of costs and outcomes; strong incremental analysis    | Some limitations in reporting indirect costs                               |
| Szymanski et al., 2022   | 8/10 | Robust incremental analysis; extensive sensitivity testing; clear description of alternatives | Reliance on assumptions regarding screening uptake and participation rates |
| van Leeuwen et al., 2021 | 9/10 | Excellent incremental analysis and robust uncertainty assessment; clear outcome measurement   | Some long-term projection assumptions require further validation           |
| Xiao et al., 2021        | 8/10 | Clear identification of cost and outcome components; effective incremental analysis           | Some limitations in detailed measurement of capital costs                  |
| Ziegelmayer et al., 2022 | 9/10 | Robust incremental and sensitivity analyses; comprehensive cost and outcome measurement       | Certain model assumptions require additional empirical validation          |

# PRISMA 2020 Checklist

| Section and Topic             | Item # | Checklist item                                                                                                                                                                                                                                                                                       | Location where item is reported |
|-------------------------------|--------|------------------------------------------------------------------------------------------------------------------------------------------------------------------------------------------------------------------------------------------------------------------------------------------------------|---------------------------------|
| <b>TITLE</b>                  |        |                                                                                                                                                                                                                                                                                                      |                                 |
| Title                         | 1      | Identify the report as a systematic review.                                                                                                                                                                                                                                                          | 1                               |
| <b>ABSTRACT</b>               |        |                                                                                                                                                                                                                                                                                                      |                                 |
| Abstract                      | 2      | See the PRISMA 2020 for Abstracts checklist.                                                                                                                                                                                                                                                         | 2                               |
| <b>INTRODUCTION</b>           |        |                                                                                                                                                                                                                                                                                                      |                                 |
| Rationale                     | 3      | Describe the rationale for the review in the context of existing knowledge.                                                                                                                                                                                                                          | 3,4,5                           |
| Objectives                    | 4      | Provide an explicit statement of the objective(s) or question(s) the review addresses.                                                                                                                                                                                                               | 5                               |
| <b>METHODS</b>                |        |                                                                                                                                                                                                                                                                                                      |                                 |
| Eligibility criteria          | 5      | Specify the inclusion and exclusion criteria for the review and how studies were grouped for the syntheses.                                                                                                                                                                                          | 25                              |
| Information sources           | 6      | Specify all databases, registers, websites, organisations, reference lists and other sources searched or consulted to identify studies. Specify the date when each source was last searched or consulted.                                                                                            | 25,26                           |
| Search strategy               | 7      | Present the full search strategies for all databases, registers and websites, including any filters and limits used.                                                                                                                                                                                 | 26                              |
| Selection process             | 8      | Specify the methods used to decide whether a study met the inclusion criteria of the review, including how many reviewers screened each record and each report retrieved, whether they worked independently, and if applicable, details of automation tools used in the process.                     | 26,27                           |
| Data collection process       | 9      | Specify the methods used to collect data from reports, including how many reviewers collected data from each report, whether they worked independently, any processes for obtaining or confirming data from study investigators, and if applicable, details of automation tools used in the process. | 26,27,28                        |
| Data items                    | 10a    | List and define all outcomes for which data were sought. Specify whether all results that were compatible with each outcome domain in each study were sought (e.g. for all measures, time points, analyses), and if not, the methods used to decide which results to collect.                        | 24                              |
|                               | 10b    | List and define all other variables for which data were sought (e.g. participant and intervention characteristics, funding sources). Describe any assumptions made about any missing or unclear information.                                                                                         | 25                              |
| Study risk of bias assessment | 11     | Specify the methods used to assess risk of bias in the included studies, including details of the tool(s) used, how many reviewers assessed each study and whether they worked independently, and if applicable, details of automation tools used in the process.                                    | 29,30                           |
| Effect measures               | 12     | Specify for each outcome the effect measure(s) (e.g. risk ratio, mean difference) used in the synthesis or presentation of results.                                                                                                                                                                  | 26                              |
| Synthesis methods             | 13a    | Describe the processes used to decide which studies were eligible for each synthesis (e.g. tabulating the study intervention characteristics and comparing against the planned groups for each synthesis (item #5)).                                                                                 | 26,27                           |
|                               | 13b    | Describe any methods required to prepare the data for presentation or synthesis, such as handling of missing summary statistics, or data conversions.                                                                                                                                                | 27                              |
|                               | 13c    | Describe any methods used to tabulate or visually display results of individual studies and syntheses.                                                                                                                                                                                               | 25                              |
|                               | 13d    | Describe any methods used to synthesize results and provide a rationale for the choice(s). If meta-analysis was performed, describe the model(s), method(s) to identify the presence and extent of statistical heterogeneity, and software package(s) used.                                          | 27,28                           |
|                               | 13e    | Describe any methods used to explore possible causes of heterogeneity among study results (e.g. subgroup analysis, meta-regression).                                                                                                                                                                 | 28                              |
|                               | 13f    | Describe any sensitivity analyses conducted to assess robustness of the synthesized results.                                                                                                                                                                                                         | 26                              |
| Reporting bias assessment     | 14     | Describe any methods used to assess risk of bias due to missing results in a synthesis (arising from reporting biases).                                                                                                                                                                              | 27                              |
| Certainty assessment          | 15     | Describe any methods used to assess certainty (or confidence) in the body of evidence for an outcome.                                                                                                                                                                                                | 27                              |

# PRISMA 2020 Checklist

| Section and Topic                              | Item # | Checklist item                                                                                                                                                                                                                                                                       | Location where item is reported |
|------------------------------------------------|--------|--------------------------------------------------------------------------------------------------------------------------------------------------------------------------------------------------------------------------------------------------------------------------------------|---------------------------------|
| <b>RESULTS</b>                                 |        |                                                                                                                                                                                                                                                                                      |                                 |
| Study selection                                | 16a    | Describe the results of the search and selection process, from the number of records identified in the search to the number of studies included in the review, ideally using a flow diagram.                                                                                         | 5,6                             |
|                                                | 16b    | Cite studies that might appear to meet the inclusion criteria, but which were excluded, and explain why they were excluded.                                                                                                                                                          | 5                               |
| Study characteristics                          | 17     | Cite each included study and present its characteristics.                                                                                                                                                                                                                            | 5,6                             |
| Risk of bias in studies                        | 18     | Present assessments of risk of bias for each included study.                                                                                                                                                                                                                         | 16,17                           |
| Results of individual studies                  | 19     | For all outcomes, present, for each study: (a) summary statistics for each group (where appropriate) and (b) an effect estimate and its precision (e.g. confidence/credible interval), ideally using structured tables or plots.                                                     | 6-11                            |
| Results of syntheses                           | 20a    | For each synthesis, briefly summarise the characteristics and risk of bias among contributing studies.                                                                                                                                                                               | 12                              |
|                                                | 20b    | Present results of all statistical syntheses conducted. If meta-analysis was done, present for each the summary estimate and its precision (e.g. confidence/credible interval) and measures of statistical heterogeneity. If comparing groups, describe the direction of the effect. | NA                              |
|                                                | 20c    | Present results of all investigations of possible causes of heterogeneity among study results.                                                                                                                                                                                       | 12,13                           |
|                                                | 20d    | Present results of all sensitivity analyses conducted to assess the robustness of the synthesized results.                                                                                                                                                                           | 13,14                           |
| Reporting biases                               | 21     | Present assessments of risk of bias due to missing results (arising from reporting biases) for each synthesis assessed.                                                                                                                                                              | 15,16,17                        |
| Certainty of evidence                          | 22     | Present assessments of certainty (or confidence) in the body of evidence for each outcome assessed.                                                                                                                                                                                  | 16,17                           |
| <b>DISCUSSION</b>                              |        |                                                                                                                                                                                                                                                                                      |                                 |
| Discussion                                     | 23a    | Provide a general interpretation of the results in the context of other evidence.                                                                                                                                                                                                    | 17,18                           |
|                                                | 23b    | Discuss any limitations of the evidence included in the review.                                                                                                                                                                                                                      | 20,21                           |
|                                                | 23c    | Discuss any limitations of the review processes used.                                                                                                                                                                                                                                | 18,19                           |
|                                                | 23d    | Discuss implications of the results for practice, policy, and future research.                                                                                                                                                                                                       | 22,23,24                        |
| <b>OTHER INFORMATION</b>                       |        |                                                                                                                                                                                                                                                                                      |                                 |
| Registration and protocol                      | 24a    | Provide registration information for the review, including register name and registration number, or state that the review was not registered.                                                                                                                                       | review was not registered       |
|                                                | 24b    | Indicate where the review protocol can be accessed, or state that a protocol was not prepared.                                                                                                                                                                                       | NA                              |
|                                                | 24c    | Describe and explain any amendments to information provided at registration or in the protocol.                                                                                                                                                                                      | NA                              |
| Support                                        | 25     | Describe sources of financial or non-financial support for the review, and the role of the funders or sponsors in the review.                                                                                                                                                        | 32                              |
| Competing interests                            | 26     | Declare any competing interests of review authors.                                                                                                                                                                                                                                   | 32                              |
| Availability of data, code and other materials | 27     | Report which of the following are publicly available and where they can be found: template data collection forms; data extracted from included studies; data used for all analyses; analytic code; any other materials used in the review.                                           | 31                              |

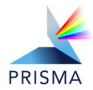

## PRISMA 2020 Checklist

*From:* Page MJ, McKenzie JE, Bossuyt PM, Boutron I, Hoffmann TC, Mulrow CD, et al. The PRISMA 2020 statement: an updated guideline for reporting systematic reviews. *BMJ* 2021;372:n71. doi: 10.1136/bmj.n71. This work is licensed under CC BY 4.0. To view a copy of this license, visit <https://creativecommons.org/licenses/by/4.0/>
